# Supplementary material
Source: PubMed Central journal article supplement (PMC4601915)
Supplement: supp_jiv228_jiv228supp.pdf [file supp_jiv228_jiv228supp.pdf]

**Supplementary Data**

Galina I. Lepesheva, Tatiana Y. Hargrove, Girish Rachakonda, Zdzislaw Wawrzak, Sébastien Pomel, Sandrine Cojean, Pius N. Nde, W. David Nes, Charles W. Locuson, M. Wade Calcutt, Michael R. Waterman, J. Scott Daniels, Philippe M. Loiseau, Fernando Villalta

**Supplementary Table 1. X-ray data collection and refinement statistics**

| <i>T. brucei</i> CYP51 in complex with VNI derivatives VFV and VNT |                              |                              |
|--------------------------------------------------------------------|------------------------------|------------------------------|
| Data collection                                                    | VFV [4G7G]                   | VNT [4G3J]                   |
| Wavelength, Å                                                      | 0.979                        | 0.979                        |
| Space group                                                        | P1                           | P1                           |
| Cell dimensions                                                    |                              |                              |
| a, b, c, Å                                                         | 59.9, 79.7, 117.9            | 60.0, 79.5, 116.4            |
| $\alpha$ , $\beta$ , $\gamma$ , °                                  | 74.6, 81.2, 69.0             | 74.6, 79.3, 68.5             |
| Molecules per asymmetric unit                                      | 4                            | 4                            |
| Solvent content, %                                                 | 50.7                         | 49.7                         |
| Resolution (last shell), Å                                         | 30.0 2.05(2.09-2.05)         | 30.0 1.82(1.85-1.82)         |
| R <sub>merge</sub> (last shell)                                    | 0.046 (0.580)                | 0.048 (0.621)                |
| I/ $\sigma$ (last shell)                                           | 31 (2.6)                     | 28.3 (2.4)                   |
| Completeness (last shell), %                                       | 98.2 (97.1)                  | 97.7 (96.2)                  |
| Redundancy (last shell)                                            | 4.6 (4.6)                    | 4.6 (4.5)                    |
| <b>Refinement</b>                                                  |                              |                              |
| Resolution, Å                                                      | 50.0-2.05                    | 29.9-1.83                    |
| R-factor                                                           | 0.163                        | 0.169                        |
| R-free                                                             | 0.226                        | 0.220                        |
| Reflections used                                                   | 114765                       | 157414                       |
| Test set size, %                                                   | 5.0                          | 5.0                          |
| Rms deviations from ideal geometry                                 |                              |                              |
| Bond lengths, Å                                                    | 0.008                        | 0.007                        |
| Bond angles, °                                                     | 1.98                         | 0.92                         |
| Ramachandran plot                                                  |                              |                              |
| Residues in favorable regions (%)                                  | 97.9                         | 97.4                         |
| Residues in allowed regions (%)                                    | 100                          | 99.9                         |
| Outliers (%)                                                       | 0                            | 0.1                          |
| <b>Model</b>                                                       |                              |                              |
| Total number of atoms                                              | 15068                        | 15243                        |
| Residues per chain (average B-factor, Å <sup>2</sup> )             |                              |                              |
| protein                                                            | 448 / 448 / 448 / 448 (44.9) | 448 / 448 / 448 / 448 (36.4) |
| heme                                                               | 1 / 1 / 1 / 1 (30.2)         | 1 / 1 / 1 / 1 (24.7)         |
| inhibitor                                                          | 1 / 1 / 1 / 1 (39.1)         | 1 / 1 / 1 / 1 (37.5)         |
| Water                                                              | 504 (44.1)                   | 705 (41.0)                   |

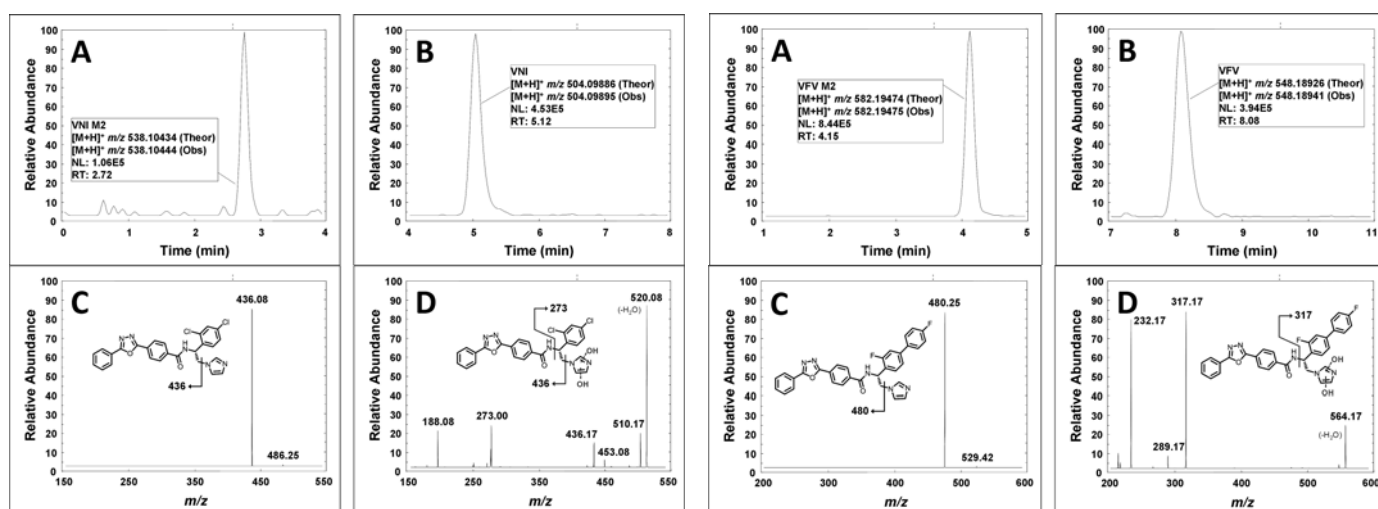

**Supplementary Figure 1. Exact mass (A, B) and fragmentation patterns (C, D) of VNI (left panel), VFV (right panel) and their [M+34] metabolites extracted from mouse plasma.** Mass-spectrometric experiments were performed using an *Acquity UPLC* system (Waters, Milford MA) and an *LTQ Orbitrap XL* mass spectrometer equipped with a standard electrospray ionization source (Thermo, San Jose CA). The *Acquity* system was equipped with a binary solvent manager, refrigerated sample manager, thermostated column heater, and a photodiode array UV detector. VFV, VNI, and related metabolites were chromatographically resolved on a Waters Symmetry reverse phase column (C18, 4.6 × 60 mm, 3.5 $\mu$ m) using isocratic elution conditions at a flow rate of 1.0 mL/min. Mobile phase consisted of 10 mM ammonium acetate in H<sub>2</sub>O/CH<sub>3</sub>CN (50:50). The eluent stream was split post-column to allow simultaneous UV and MS detection (70:30, UV detector /ESI source). The injection volume for all samples was 10  $\mu$ L. The mass spectrometer was operated in positive ionization mode; the electrospray source parameters were as follows: N<sub>2</sub> sheath gas, 30; N<sub>2</sub> aux gas, 5; spray voltage, 4.0 kV; capillary temp, 300 °C; tube lens voltage, 60 V at  $m/z$  500; capillary voltage, 21 V; skimmer offset, 0. Full scan spectra of 100-800  $m/z$  were acquired in FTMS mode at a resolving power of 30,000 FWHM with the following AGC parameters: IT target, 3e<sup>4</sup>; FT target, 1e<sup>6</sup>; 1 microscan, maximum inject time, 50 ms. Data acquisition and analysis were carried out using *Xcalibur v. 2.0.7* and *LTQ Orbitrap v. 2.5.5* software (Thermo).

**Supplementary Table 2. Sterol composition of *Leishmania amazonensis*, non-treated and treated with VNI**

| Sterols (IUPAC nomenclature)                                                                            | Structure                                                                           | Rf<br>TLC | HPLC<br>RT/ $\alpha_c$ | UV<br>absorbance<br>max | Molecular<br>weight | Percentage of total sterol content<br>(fg/cell) |                     |
|---------------------------------------------------------------------------------------------------------|-------------------------------------------------------------------------------------|-----------|------------------------|-------------------------|---------------------|-------------------------------------------------|---------------------|
|                                                                                                         |                                                                                     |           |                        |                         |                     | Control (134)                                   | 1 $\mu$ M VNI (130) |
| Cholesterol<br>(cholesta-5-en-3 $\beta$ -ol)<br><b>(exogenous)</b>                                      | 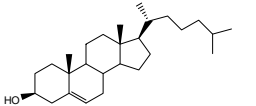   | 0.36      | 26.6/1.0               | 204                     | 386                 | 3 (4)                                           | 6 (8)               |
| Lanosterol<br>(lanosta-8,24-dien-3 $\beta$ -ol)                                                         |    | 0.57      | 25.6/0.96              | 204                     | 426                 | <1                                              | <1                  |
| Eburicol<br>(24-methylenelanosta-8-en-3 $\beta$ -ol)                                                    |    | 0.55      | 29.9/1.12              | 204                     | 440                 | -                                               | 2 (3)               |
| Obtusifoliol<br>(4 $\alpha$ ,14 $\alpha$ -dimethyl-5 $\alpha$ -ergosta-8,24(24')-dien-3 $\beta$ -ol)    |   | 0.49      | 23.8/0.89              | 204                     | 426                 | -                                               | 6 (8)               |
| C4-Norlanosterol<br>(4 $\alpha$ ,14 $\alpha$ -dimethylcholesta-8,24-dien-3 $\beta$ -ol)                 |  | 0.49      | 20.8/0.78              | 204                     | 412                 | 4 (5)                                           | 8 (11)              |
| 14 $\alpha$ -Methylzymosterol<br>(14 $\alpha$ -methylcholesta-8,24-dien-3 $\beta$ -ol)                  |  | 0.33      | 17.2/0.65              | 204                     | 398                 | -                                               | 13 (17)             |
| 14 $\alpha$ -Methylfecosterol<br>(14 $\alpha$ -methyl-5 $\alpha$ -ergosta-8,24(24')-dien-3 $\beta$ -ol) |  | 0.32      | 19.7/0.74              | 204                     | 412                 | -                                               | 18 (24)             |
| Ergosterol<br>(ergosta-5,7,22-trien-3 $\beta$ -ol)                                                      |  | 0.31      | 19.4/0.71              | 282                     | 396                 | 12 (16)                                         | 5 (7)               |
| Episterol<br>(ergosta-7,24(24')-dien-3 $\beta$ -ol)                                                     |  | 0.31      | 19.4/0.71              | 204                     | 398                 | 6 (8)                                           | -                   |
| 5-Dehydroepisterol<br>(ergosta-5,7,24(24')-trien-3 $\beta$ -ol)                                         |  | 0.31      | 16.4/0.61              | 282                     | 396                 | 75(100)                                         | 39 (51)             |

About 300 mg of the cell pellet was saponified with 10 % KOH in 98% aqueous methanol at reflux temperature for 1 hour. The neutral lipids obtained by dilution with water and extraction with hexane were subjected to silica

gel TLC plates (0.25  $\mu\text{m}$ , Whatman, Germany) for 30 min in hexane:ethyl acetate (8:2) as developing solvent and monitored in an iodine chamber. Individual sterols were separated by HPLC (Waters) using a reverse-phase Nova Pak C<sub>18</sub> column (particle size 4  $\mu\text{M}$ , 3.9 x 150 mm) and a solution of 23% acetonitrile, 72% methanol and 5% water as the mobile phase at a flow rate 0.8 ml/min for 35 min. The injection volume was 100 $\mu\text{l}$  and the UV detector wavelengths were set at 204 nm and 282 nm. The peaks were collected and the sterols were quantified and identified by combination of UV-spectrophotometry and mass-spectrometry as described in [16].
